# Supplementary material
Source: ML conference proceedings conference paper supplement (https://openaccess.thecvf.com/content/ICCV2023/html/Cao_Anomaly_Detection_Under_ICCV_2023_paper.html)
Supplement: Supplementary file 1 [file Cao_Anomaly_Detection_Under_ICCV_2023_supplemental.pdf]

# Supplementary Material of “Anomaly Detection under Distribution Shift”

Tri Cao, Jiawen Zhu, and Guansong Pang

School of Computing and Information Systems, Singapore Management University

## 1. Full results on MNIST/MNIST-M, PACS and MVTec

The full experimental results on the MNIST/MNIST-M, PACS and MVTec datasets are presented in Tables 1, 2, and 3, respectively. These tables provide a detailed illustration of the performance of the considered methods and the proposed method GNL. It is observed that GNL consistently outperforms the compared methods on many subsets of these datasets, indicating the effectiveness and robustness of GNL.

## 2. Implementation details

### 2.1. Training

With MVTec, all images in MVTec are resized to 256x256. We take ResNet50 [1] as the backbone of the teacher encoder. The hyperparameters for PACS are the same as for MVTec. For MNIST/MNIST-M, all images are in their original scale, which are  $28 \times 28$ . We take ResNet18 [1] as the backbone of the teacher encoder.

With all datasets, the learning rate is set to 0.005 with a batch size of 16 and is optimized by Adam [2] optimizer with  $\beta = (0.5, 0.999)$ . The model is trained 20 epochs on MVTec, PACS, CIFAR-10 and 5 epochs on MNIST/MNIST-M dataset. The pseudo code of our training is shown in Algorithm 1.

---

### Algorithm 1

---

The pseudo code of our training

- 1: **for** each batch  $(ori, aug)$  in dataloader **do**
- 2:    $ens\_ori \leftarrow encoder(ori)$     $\triangleright$  Return a tuple with 3 embedded features from three residual encoder blocks, ordered from low-level features to abstract features
- 3:    $bn\_ori \leftarrow bn(ens\_ori)$     $\triangleright$  The feature at Bottleneck
- 4:    $des\_ori \leftarrow decoder(bn\_ori)$     $\triangleright$  Return a tuple with 3 reconstructed features from three residual decoder blocks, ordered from low-level features to abstract features
- 5:    $loss\_ori \leftarrow loss(ens\_ori, des\_ori)$
- 6:    $losses\_abs \leftarrow 0$
- 7:    $losses\_lowf \leftarrow 0$
- 8:   **for** each augmented image  $aug$  in  $aug$  **do**
- 9:      $ens\_aug \leftarrow encoder(aug)$
- 10:      $bn\_aug \leftarrow bn(ens\_aug)$
- 11:      $des\_aug \leftarrow decoder(bn\_aug)$
- 12:      $loss\_abs \leftarrow loss(bn\_ori, bn\_aug)$
- 13:      $loss\_lowf \leftarrow loss(des\_ori[0], des\_aug[0])$
- 14:      $losses\_abs \leftarrow losses\_abs + loss\_abs$
- 15:      $losses\_lowf \leftarrow losses\_lowf + loss\_lowf$
- 16:   **end for**
- 17:    $losses\_abs \leftarrow losses\_abs/N$
- 18:    $losses\_lowf \leftarrow losses\_lowf/N$
- 19:    $sum\_loss \leftarrow alpha\_ori \times loss\_ori + alpha\_abs \times losses\_abs + alpha\_lowf \times loss\_lowf$
- 20:   Compute gradients of  $sum\_loss$  with respect to the trainable parameters of the model
- 21:   Update the trainable parameters of the model using the optimizer
- 22: **end for**

---

### 2.2. Inference

For a given test sample  $x$ , our test time augmentation method performs the augmentation as follows:

$$FDM(\mathcal{C}, \mathcal{V}, \alpha) : \mathcal{C}_{\tau_i} = (1 - \alpha)\mathcal{C}_{\tau_i} + \alpha\mathcal{V}_{\kappa_i}, \quad (1)$$

where  $\{\mathcal{C}_{\tau_i}\}_{i=1}^n$  and  $\{\mathcal{V}_{\kappa_i}\}_{i=1}^n$  are sorted values of embedded feature  $\mathcal{C}$  and  $\mathcal{V}$  in ascending order. Here,  $n$  represents

the number of elements in vector  $\mathcal{C}$  and  $\mathcal{V}$ . Note that  $\mathcal{C}$  is the embedded feature of the test sample  $x$ , which plays the role of carrying the appearance information.  $\mathcal{V}$  is the embedded feature of a normal sample randomly sampled from the training data, carrying the style information. In this way, the semantic information of the test sample is preserved, while its style information is pulled closer to the training data’s style.

To calculate the anomaly score, we use a similar method as in RD4AD. First, we calculate the anomaly maps of the test sample  $x$  at multi-level feature as follows:

$$\mathcal{M}^k = 1 - \text{sim}(\mathcal{P}^k, \mathcal{L}^k) \quad (2)$$

where  $\mathcal{P}^k$  and  $\mathcal{L}^k$  respectively are the embedded feature and the reconstructed feature of  $x$  at  $k^{\text{th}}$  encoding/decoding block in our method, and  $\text{sim}$  is a cosine similarity measure. Next, we increase the resolution of the feature maps  $\mathcal{M}^k$  to match the input image size. To accomplish this, we use a bilinear up-sampling operation denoted as  $\Psi$ . We then accumulate these anomaly maps pixel-wise to generate a score map via:

$$S_{AL} = \sum_{k=1}^3 \Psi(\mathcal{M}^k) \quad (3)$$

Lastly, we choose the max value in  $S_{AL}$  as the anomaly score of  $x$ .

## References

- [1] Kaiming He, Xiangyu Zhang, Shaoqing Ren, and Jian Sun. Deep residual learning for image recognition. In *Proceedings of the IEEE conference on computer vision and pattern recognition*, pages 770–778, 2016. 1
- [2] Diederik P Kingma and Jimmy Ba. Adam: A method for stochastic optimization. *arXiv preprint arXiv:1412.6980*, 2014. 1

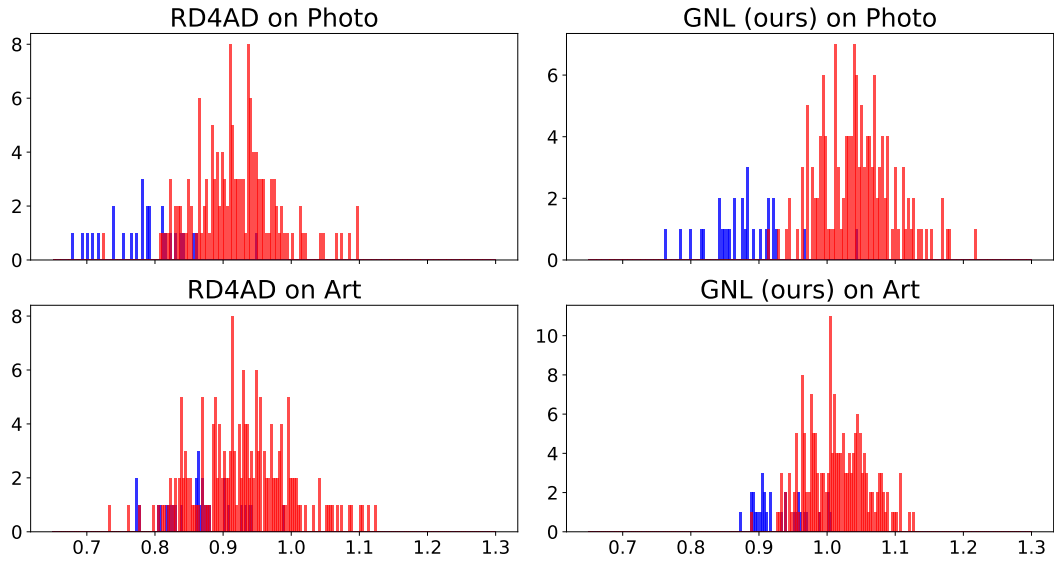

(a) Anomaly scores on PACS ('elephant' as the normal class)

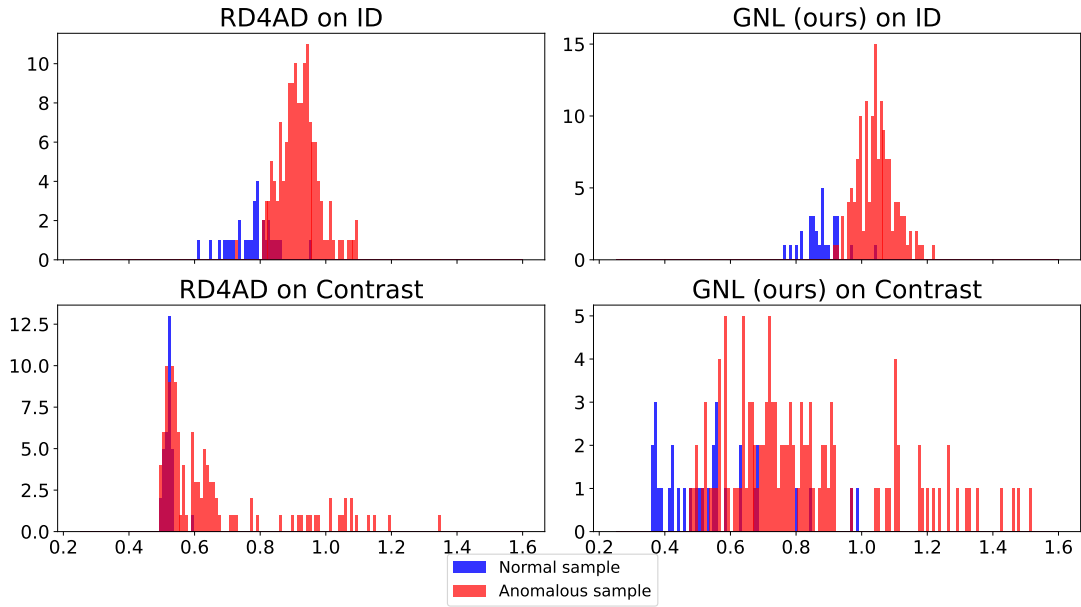

(b) Anomaly scores on MVTec (the 'Zipper' data)

Figure 1: Distribution of anomaly scores yielded by our method and RD4AD.

| Class      | 0            |              | 1            |              | 2            |              | 3            |              | 4            |              | 5            |              | 6            |              | 7            |              | 8            |              | 9            |              |
|------------|--------------|--------------|--------------|--------------|--------------|--------------|--------------|--------------|--------------|--------------|--------------|--------------|--------------|--------------|--------------|--------------|--------------|--------------|--------------|--------------|
|            | ID           | OOD          |
| Deep-SVDD  | 99.24        | 48.08        | 99.72        | 52.96        | 96.53        | 46.28        | 96.61        | 51.92        | 96.48        | 50.36        | 99.27        | 48.10        | 99.76        | 52.97        | 96.56        | 46.28        | 96.61        | 51.92        | 96.48        | 50.36        |
| f-AnoGAN   | 99.41        | 54.04        | 99.85        | 56.24        | 96.52        | 49.60        | 95.08        | 52.97        | 96.81        | 50.71        | <b>99.35</b> | 54.04        | <b>99.89</b> | 56.31        | 96.36        | 49.60        | 95.08        | 52.97        | 96.81        | 50.71        |
| KDAD       | 99.85        | 58.22        | <b>99.88</b> | 57.15        | 98.42        | 52.99        | <b>99.06</b> | 55.80        | <b>98.38</b> | 51.95        | 98.33        | 57.11        | 99.49        | 55.51        | 98.69        | 52.02        | 98.45        | 56.88        | 98.16        | 51.12        |
| RD4AD      | 99.56        | 71.50        | 99.50        | 60.09        | <b>99.11</b> | 51.93        | 98.01        | 55.73        | 96.75        | 50.56        | 98.90        | 58.34        | 99.79        | 64.60        | <b>99.21</b> | 57.37        | 98.90        | 55.77        | 99.17        | 55.03        |
| Augmix     | 99.78        | 70.83        | 98.64        | 62.84        | 97.66        | 53.28        | 98.41        | 58.29        | 97.51        | 54.25        | 97.12        | 62.15        | 98.83        | 62.33        | 98.32        | 61.44        | 97.38        | 55.91        | 98.98        | 54.74        |
| Mixstyle   | 99.61        | 69.90        | 99.57        | 58.54        | 98.76        | 51.19        | 98.85        | 56.04        | 95.83        | 49.10        | 98.92        | 58.43        | 99.57        | 63.14        | 99.16        | 56.74        | 98.99        | 54.98        | 99.17        | 54.14        |
| EFDM       | 98.09        | 69.60        | 99.36        | 59.33        | 98.39        | 50.74        | 98.86        | 55.53        | 95.79        | 49.96        | 98.81        | 58.30        | 99.59        | 62.92        | 99.09        | 56.66        | <b>99.02</b> | 55.09        | <b>99.18</b> | 54.19        |
| Jigsaw     | <b>99.90</b> | 71.13        | 99.86        | 60.83        | 99.01        | 51.71        | 98.85        | 56.62        | 96.18        | 52.71        | 98.74        | 59.15        | 99.75        | 64.18        | 99.16        | 58.08        | 98.54        | 55.86        | 99.00        | 54.81        |
| GNL (Ours) | 99.40        | <b>80.54</b> | 99.55        | <b>71.95</b> | 96.52        | <b>63.87</b> | 95.92        | <b>64.69</b> | 95.05        | <b>64.91</b> | 94.48        | <b>75.33</b> | 97.93        | <b>79.48</b> | 97.46        | <b>71.25</b> | 94.69        | <b>64.43</b> | 98.13        | <b>72.27</b> |

Table 1: Full AUROC (%) results on MNIST/MNIST-M.

| Dataset    | Dog          |              |              |              | Elephant     |              |              |              | Giraffe      |              |              |              |
|------------|--------------|--------------|--------------|--------------|--------------|--------------|--------------|--------------|--------------|--------------|--------------|--------------|
|            | Photo        | Art          | Cartoon      | Sketch       | Photo        | Art          | Cartoon      | Sketch       | Photo        | Art          | Cartoon      | Sketch       |
| Deep-SVDD  | 43.25        | 55.60        | 42.99        | 38.00        | 47.47        | 53.65        | 40.86        | 37.09        | 36.39        | 53.59        | 38.44        | 37.26        |
| f-AnoGAN   | 46.30        | 54.06        | 42.90        | 42.90        | 67.36        | 44.09        | <b>79.99</b> | 34.11        | 64.96        | 51.13        | 47.30        | 51.79        |
| KDAD       | <b>76.15</b> | 62.50        | 40.38        | 41.53        | 91.78        | 50.52        | 76.75        | 15.53        | 87.91        | <b>55.67</b> | <b>65.53</b> | 63.79        |
| RD4AD      | 70.39        | 67.16        | 47.77        | 53.57        | <b>92.07</b> | 58.89        | 65.81        | 61.20        | 76.82        | 46.20        | 53.57        | 46.73        |
| Augmix     | 70.36        | 64.33        | 47.08        | 53.80        | 83.36        | 58.83        | 66.31        | 67.16        | 63.75        | 48.38        | 51.44        | 45.70        |
| Mixstyle   | 72.63        | 65.61        | 48.46        | 52.99        | 86.97        | 60.72        | 65.93        | 63.69        | 74.72        | 48.42        | 55.64        | 43.79        |
| EFDM       | 71.81        | 67.06        | 46.95        | 57.05        | 85.46        | 60.80        | 67.12        | 64.61        | 77.64        | 47.21        | 58.27        | 41.96        |
| Jigsaw     | 47.37        | 44.29        | 40.43        | 38.38        | 62.27        | 60.40        | 56.61        | 47.80        | 68.59        | 51.27        | 45.32        | 46.81        |
| GNL (Ours) | 76.13        | <b>70.04</b> | <b>57.75</b> | <b>59.35</b> | 90.86        | <b>66.20</b> | 74.83        | <b>67.80</b> | <b>88.27</b> | 53.80        | 54.21        | <b>64.11</b> |

Table 2: Full AUROC (%) results on PACS (Part I).

| Dataset    | Guitar       |              |              |              | Horse        |              |              |              | House        |              |              |              | Person        |              |              |              |
|------------|--------------|--------------|--------------|--------------|--------------|--------------|--------------|--------------|--------------|--------------|--------------|--------------|---------------|--------------|--------------|--------------|
|            | Photo        | Art          | Cartoon      | Sketch       | Photo        | Art          | Cartoon      | Sketch       | Photo        | Art          | Cartoon      | Sketch       | Photo         | Art          | Cartoon      | Sketch       |
| Deep-SVDD  | 41.79        | 55.20        | 44.47        | 39.51        | 43.07        | 53.39        | 39.24        | 38.19        | 38.89        | 52.69        | 39.92        | 44.92        | 35.25         | 49.83        | 42.70        | 41.40        |
| f-AnoGAN   | 42.82        | 34.65        | 56.25        | <b>96.94</b> | 51.72        | 50.40        | 39.76        | 33.28        | 58.76        | 53.17        | 49.47        | <b>94.21</b> | 97.45         | 63.57        | 51.25        | 93.19        |
| KDAD       | 77.19        | 53.79        | 82.26        | 67.13        | <b>85.41</b> | 51.99        | 51.69        | 43.31        | <b>98.76</b> | 91.12        | 65.53        | 64.54        | <b>100.00</b> | <b>74.39</b> | <b>56.31</b> | <b>64.00</b> |
| RD4AD      | 76.62        | 59.35        | 76.71        | 49.48        | 64.15        | 59.18        | 46.93        | 53.24        | 93.52        | 76.29        | 79.92        | 61.65        | 96.85         | 60.39        | 51.66        | 59.53        |
| Augmix     | 63.68        | <b>60.15</b> | 67.86        | 55.23        | 64.22        | 56.07        | 48.66        | 46.52        | 95.62        | 74.49        | 80.38        | 79.37        | 93.46         | 61.26        | 51.03        | 57.22        |
| Mixstyle   | 68.56        | 59.98        | 77.22        | 47.19        | 55.57        | 54.88        | 50.70        | 51.91        | 94.97        | 74.85        | 76.81        | 64.21        | 94.19         | 62.03        | 51.72        | 60.43        |
| EFDM       | 65.35        | 56.99        | 77.79        | 47.78        | 61.05        | 56.75        | 52.82        | 53.51        | 92.47        | 73.34        | 80.64        | 63.45        | 95.49         | 61.70        | 51.45        | 61.04        |
| Jigsaw     | 55.63        | 51.59        | 61.96        | 95.72        | 55.45        | 50.44        | 42.57        | 40.13        | 70.28        | 52.29        | 81.26        | 88.34        | 75.71         | 57.54        | 48.69        | 77.90        |
| GNL (Ours) | <b>85.37</b> | 57.68        | <b>82.53</b> | 45.33        | 77.59        | <b>60.20</b> | <b>63.64</b> | <b>69.71</b> | 97.55        | <b>91.14</b> | <b>88.79</b> | 75.42        | 97.95         | 60.31        | 53.97        | 55.01        |

Table 3: Full AUROC (%) results on PACS (Part II).
